# Supplementary material for: Complex Tissue-Specific Patterns and Distribution of Multiple RAGE Splice Variants in Different Mammals
Source: PubMed Central journal article supplement — Genome Biol Evol. 2013 Nov 22;5(12):2420–35. doi: 10.1093/gbe/evt188 (PMC3879976; doi:10.1093/gbe/evt188), 2013-11-22

# Homo sapiens

| SP | IgV | IgC2 (1) | IgC2 (2) | TM | Tail | Nomenclature        | Previous nomenclature (if changed) | Experimental | Databases (experimentally) | Genbank entry no. | Previously described by: |
|----|-----|----------|----------|----|------|---------------------|------------------------------------|--------------|----------------------------|-------------------|--------------------------|
| 1  | 2 3 | 4 5 6    | 7 8      | 10 | 11   | <i>Hsap</i> RAGEv1  |                                    | █            | □                          | GU139370          |                          |
|    |     |          |          |    |      | <i>Hsap</i> RAGEv2  |                                    | █            | □                          | GU139371          |                          |
|    |     |          |          |    |      | <i>Hsap</i> RAGEv3  |                                    | █            | □                          | GU139372          |                          |
|    |     |          |          |    |      | <i>Hsap</i> RAGEv4  |                                    | █            | □                          | GU139373          |                          |
|    |     |          |          |    |      | <i>Hsap</i> RAGEv5  |                                    | █            | □                          | GU139374          |                          |
|    |     |          |          |    |      | NtRAGEΔ             |                                    | □            | █                          | HQ148135          | Ding and Keller 2005b    |
|    |     |          |          |    |      | <i>Hsap</i> RAGEv6  |                                    | █            | □                          | GU139375          |                          |
|    |     |          |          |    |      | <b>Tv10-RAGE</b>    | N-truncated                        | █            | █                          | <b>NR_038190</b>  | Yonekura et al. 2003     |
|    |     |          |          |    |      | <i>Hsap</i> RAGEv7  |                                    | █            | □                          | GU139376          |                          |
|    |     |          |          |    |      | <i>Hsap</i> RAGEv8  |                                    | █            | □                          | GU139377          |                          |
|    |     |          |          |    |      | <i>Hsap</i> RAGEv9  |                                    | █            | □                          | GU139378          |                          |
|    |     |          |          |    |      | sRAGEΔ              |                                    | □            | █                          | HQ148134          | Ding and Keller 2005b    |
|    |     |          |          |    |      | Tv2-RAGE            | RAGE_v5                            | █            | █                          | NM_001206929      | Hudson et al. 2008       |
|    |     |          |          |    |      | Tv4-RAGE            | RAGE_v6                            | █            | █                          | NM_001206934      | Hudson et al. 2008       |
|    |     |          |          |    |      | <b>Tv1-RAGE</b>     |                                    | █            | █                          | <b>NM_001136</b>  | Neeper et al.1992        |
|    |     |          |          |    |      | RAGEΔ               |                                    | □            | █                          | HQ148133          | Ding and Keller 2005b    |
|    |     |          |          |    |      | Tv6-RAGE            | C-truncated                        | █            | █                          | NM_001206940      | Yonekura et al. 2003     |
|    |     |          |          |    |      | Tv9-RAGE            | RAGE_v10                           | □            | █                          | NM_001206966      | Hudson et al. 2008       |
|    |     |          |          |    |      | Tv3-RAGE            | RAGE_v4                            | □            | █                          | NM_001206932      | Hudson et al. 2008       |
|    |     |          |          |    |      | RAGE_v3             |                                    | □            | █                          | DQ104253          | Hudson et al. 2008       |
|    |     |          |          |    |      | RAGE_v7             |                                    | □            | █                          | DQ104251          | Hudson et al. 2008       |
|    |     |          |          |    |      | Tv5-RAGE            | RAGE_v8                            | □            | █                          | NM_001206936      | Hudson et al. 2008       |
|    |     |          |          |    |      | Tv8-RAGE            | RAGE_v9                            | □            | █                          | NM_001206954      | Hudson et al. 2008       |
|    |     |          |          |    |      | Tv7-RAGE            |                                    | □            | █                          | NM_172197         | Malherbe et al. 1999     |
|    |     |          |          |    |      | RAGE_v12            |                                    | █            | █                          | AY755625          | Hudson et al. 2008       |
|    |     |          |          |    |      | RAGE_v13            |                                    | □            | █                          | AY755627          | Hudson et al. 2008       |
|    |     |          |          |    |      | RAGE_v11            |                                    | █            | █                          | AY755626          | Hudson et al. 2008       |
|    |     |          |          |    |      | <i>Hsap</i> RAGEv10 |                                    | █            | □                          | GU139379          |                          |
|    |     |          |          |    |      | <i>Hsap</i> RAGEv11 |                                    | █            | □                          | GU139380          |                          |
|    |     |          |          |    |      | <i>Hsap</i> RAGEv12 |                                    | █            | □                          | GU139381          |                          |
|    |     |          |          |    |      | <i>Hsap</i> RAGEv13 |                                    | █            | □                          | GU139382          |                          |
|    |     |          |          |    |      | <i>Hsap</i> RAGEv14 |                                    | █            | □                          | GU139383          |                          |
|    |     |          |          |    |      | <i>Hsap</i> RAGEv15 |                                    | █            | □                          | GU139384          |                          |

█ Signal peptide (SP)      █ Ig constant (IgC2) domain      █ Non-coding sequences  
█ Ig variable (IgV) domain      █ Transmembrane region (TM)      █ Coding sequences

# Macaca mulatta

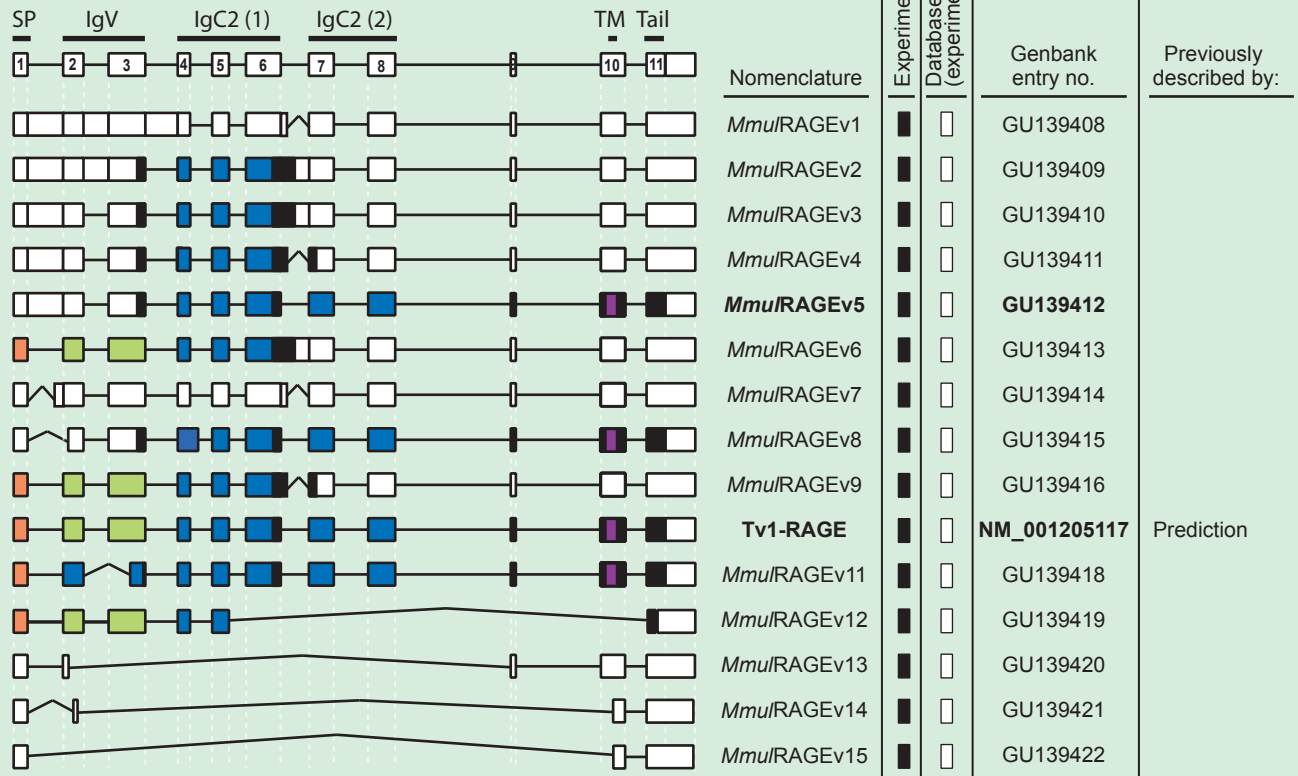

█ Signal peptide (SP)      █ Ig constant (IgC2) domain      █ Non-coding sequences  
█ Ig variable (IgV) domain      █ Transmembrane region (TM)      █ Coding sequences

# Bos taurus

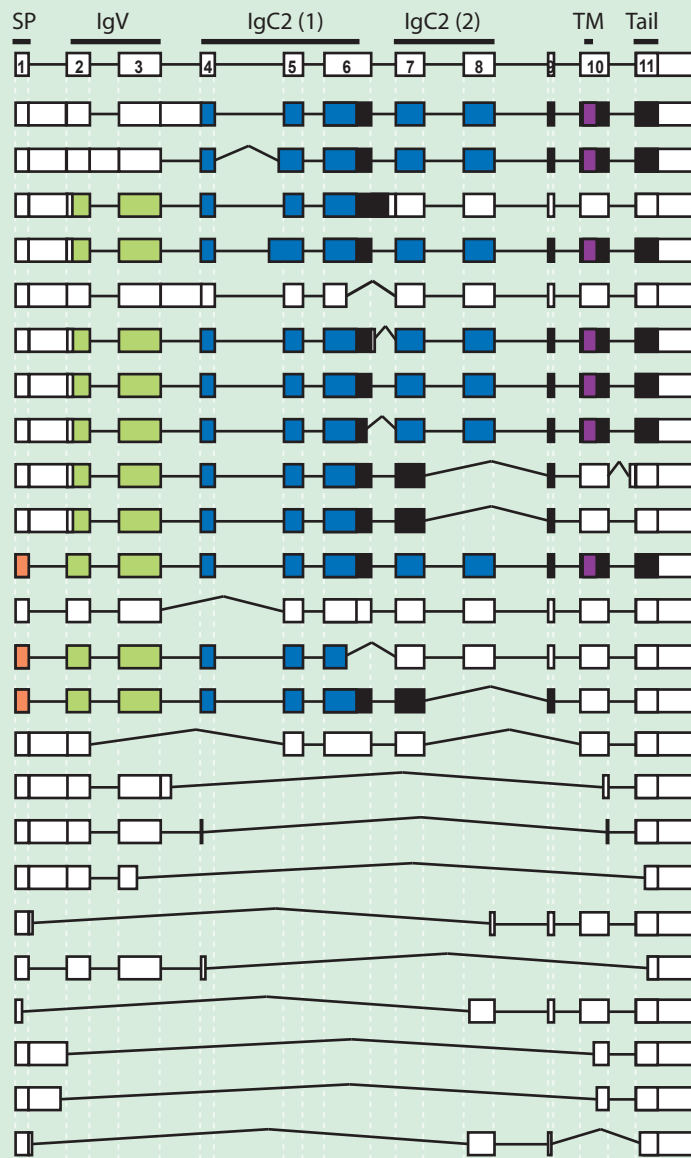

Nomenclature

*Btau*RAGEv1  
*Btau*RAGEv2  
*Btau*RAGEv3  
*Btau*RAGEv4  
*Btau*RAGEv5  
*Btau*RAGEv6  
***Btau*RAGEv7**  
*Btau*RAGEv8  
*Btau*RAGEv9  
*Btau*RAGEv10  
**Tv1-RAGE**  
*Btau*RAGEv11  
*Btau*RAGEv12  
*Btau*RAGEv13  
*Btau*RAGEv14  
*Btau*RAGEv15  
*Btau*RAGEv16  
*Btau*RAGEv17  
*Btau*RAGEv18  
*Btau*RAGEv19  
*Btau*RAGEv20  
*Btau*RAGEv21  
*Btau*RAGEv22  
*Btau*RAGEv23

Experimental

Databases  
(experimentally)

Genbank  
entry no.

Previously  
described by:

GU139385  
 GU139386  
 GU139387  
 GU139388  
 GU139389  
 GU139390  
**GU139391**  
 GU139392  
 GU139393  
 GU139394  
**NM\_173982**  
 GU139395  
 GU139396  
 GU139397  
 GU139398  
 GU139399  
 GU139400  
 GU139401  
 GU139402  
 GU139403  
 GU139404  
 GU139405  
 GU139406  
 GU139407

Neeper et al.1992

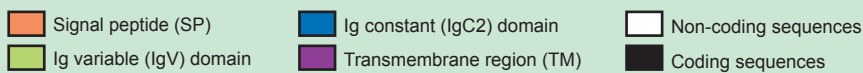

# *Sus scrofa*

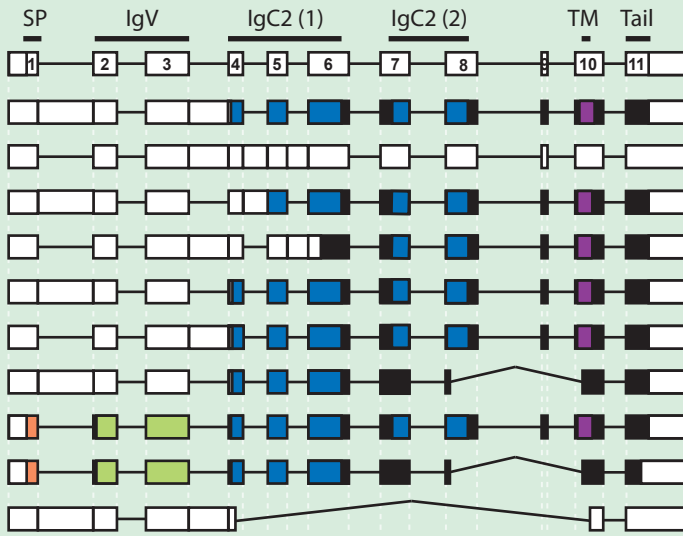

Nomenclature

*SscrRAGEv1*  
*SscrRAGEv2*  
*SscrRAGEv3*  
*SscrRAGEv4*  
***SscrRAGEv5***  
*SscrRAGEv6*  
*SscrRAGEv7*  
**Tv1-RAGE**  
*SscrRAGEv8*  
*SscrRAGEv9*

Experimental

Databases  
(experimentally)

Genbank  
entry no.

Previously  
described by:

GU164706  
 GU164707  
 GU164708  
 GU164709  
**GU164710**  
 GU164711  
 GU164712  
**NM\_001123218**  
 GU164713  
 GU164714

Prediction

Signal peptide (SP)     
  Ig constant (IgC2) domain     
  Non-coding sequences  
 Ig variable (IgV) domain     
  Transmembrane region (TM)     
  Coding sequences

# Mus musculus

| SP | IgV | IgC2 (1) | IgC2 (2) | TM | Tail | Nomenclature        | Previous nomenclature (if changed) | Experimental Databases (experimentally) | Genbank entry no. | Previously described by: |
|----|-----|----------|----------|----|------|---------------------|------------------------------------|-----------------------------------------|-------------------|--------------------------|
| 1  | 2 3 | 4 5 6    | 7 8      | 10 | 11   | mRAGE_v6            |                                    | <input type="checkbox"/>                | EU570245          | Kalea et al. 2009        |
|    |     |          |          |    |      | mRAGE_v17           |                                    | <input type="checkbox"/>                | EU906865          | Kalea et al. 2009        |
|    |     |          |          |    |      | mRAGE_v5            |                                    | <input checked="" type="checkbox"/>     | EU570244          | Kalea et al. 2009        |
|    |     |          |          |    |      | mRAGE_v7            |                                    | <input type="checkbox"/>                | EU570246          | Kalea et al. 2009        |
|    |     |          |          |    |      | mRAGE_v16           |                                    | <input type="checkbox"/>                | EU906864          | Kalea et al. 2009        |
|    |     |          |          |    |      | esRAGE              |                                    | <input type="checkbox"/>                | AB207883          | Harashima et al. 2006    |
|    |     |          |          |    |      | <b>Tv6-RAGE</b>     | mRAGE_v2                           | <input checked="" type="checkbox"/>     | <b>NR_073175</b>  | Kalea et al. 2009        |
|    |     |          |          |    |      | Tv5-RAGE            | mRAGE_v1                           | <input type="checkbox"/>                | NR_073173         | Kalea et al. 2009        |
|    |     |          |          |    |      | Tv7-RAGE            | mRAGE_v8                           | <input type="checkbox"/>                | NR_073176         | Kalea et al. 2009        |
|    |     |          |          |    |      | Tv4-RAGE (d)        | <i>MmusRAGEv1</i>                  | <input checked="" type="checkbox"/>     | NM_001271424      |                          |
|    |     |          |          |    |      | <b>Tv1-RAGE (a)</b> |                                    | <input checked="" type="checkbox"/>     | <b>NM_007425</b>  | Canonical isoform        |
|    |     |          |          |    |      | Tv2-RAGE (b)        | mRAGE_v4                           | <input checked="" type="checkbox"/>     | NM_001271422      | Kalea et al. 2009        |
|    |     |          |          |    |      | Tv3-RAGE (c)        | mRAGE_v15                          | <input type="checkbox"/>                | NM_001271423      | Kalea et al. 2009        |
|    |     |          |          |    |      | <i>MmusRAGEv2</i>   |                                    | <input checked="" type="checkbox"/>     | GU164728          |                          |
|    |     |          |          |    |      | <i>MmusRAGEv3</i>   |                                    | <input checked="" type="checkbox"/>     | GU164729          |                          |
|    |     |          |          |    |      | <i>MmusRAGEv4</i>   |                                    | <input checked="" type="checkbox"/>     | GU164730          |                          |
|    |     |          |          |    |      | <i>MmusRAGEv5</i>   |                                    | <input checked="" type="checkbox"/>     | GU164731          |                          |
|    |     |          |          |    |      | <i>MmusRAGEv6</i>   |                                    | <input checked="" type="checkbox"/>     | GU164732          |                          |
|    |     |          |          |    |      | mRAGE_v14           |                                    | <input type="checkbox"/>                | EU906862          | Kalea et al. 2009        |
|    |     |          |          |    |      | <i>MmusRAGEv7</i>   |                                    | <input checked="" type="checkbox"/>     | GU164733          |                          |
|    |     |          |          |    |      | mRAGE_v10           |                                    | <input checked="" type="checkbox"/>     | EU906858          | Kalea et al. 2009        |
|    |     |          |          |    |      | <i>MmusRAGEv8</i>   |                                    | <input checked="" type="checkbox"/>     | GU164734          |                          |
|    |     |          |          |    |      | mRAGE_v9            |                                    | <input type="checkbox"/>                | EU906857          | Kalea et al. 2009        |
|    |     |          |          |    |      | <i>MmusRAGEv9</i>   |                                    | <input checked="" type="checkbox"/>     | GU164735          |                          |
|    |     |          |          |    |      | mRAGE_v11           |                                    | <input type="checkbox"/>                | EU906859          | Kalea et al. 2009        |
|    |     |          |          |    |      | <i>MmusRAGEv10</i>  |                                    | <input checked="" type="checkbox"/>     | GU164736          |                          |
|    |     |          |          |    |      | <i>MmusRAGEv11</i>  |                                    | <input checked="" type="checkbox"/>     | GU164737          |                          |
|    |     |          |          |    |      | mRAGE_v12           |                                    | <input type="checkbox"/>                | EU906860          | Kalea et al. 2009        |
|    |     |          |          |    |      | <i>MmusRAGEv12</i>  |                                    | <input checked="" type="checkbox"/>     | GU164738          |                          |
|    |     |          |          |    |      | <i>MmusRAGEv13</i>  |                                    | <input checked="" type="checkbox"/>     | GU164739          |                          |
|    |     |          |          |    |      | mRAGE_v13           |                                    | <input type="checkbox"/>                | EU906861          | Kalea et al. 2009        |

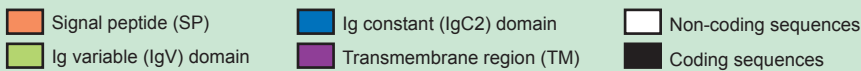

# Rattus norvegicus

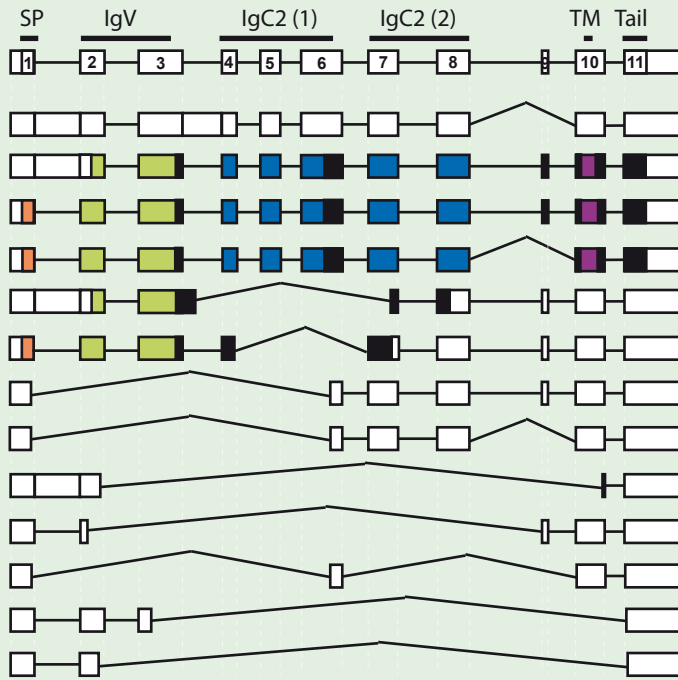

Nomenclature

*RnorRAGEv1*  
*RnorRAGEv2*  
**Tv1-RAGE**  
*RnorRAGEv3*  
*RnorRAGEv4*  
*RnorRAGEv5*  
*RnorRAGEv6*  
*RnorRAGEv7*  
*RnorRAGEv8*  
*RnorRAGEv9*  
*RnorRAGEv10*  
*RnorRAGEv11*  
*RnorRAGEv12*

| Experimental | Databases (experimentally) |
|--------------|----------------------------|
| █            | □                          |
| █            | □                          |
| █            | □                          |
| █            | □                          |
| █            | □                          |
| █            | □                          |
| █            | □                          |
| █            | □                          |
| █            | □                          |
| █            | □                          |
| █            | □                          |
| █            | □                          |
| █            | □                          |
| █            | □                          |

Genbank entry no.  
 GU164715  
**GU164716**  
**NM\_053336**  
 GU164717  
 GU164718  
 GU164719  
 GU164720  
 GU164721  
 GU164722  
 GU164723  
 GU164724  
 GU164725  
 GU164726

Previously described by:  
 Prediction

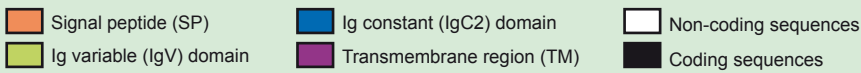

Supplement: supp_evt188_Supplementary_Figure_1.pdf [file supp_evt188_Supplementary_Figure_1.pdf]
