# Supplementary material for: Complex Tissue-Specific Patterns and Distribution of Multiple RAGE Splice Variants in Different Mammals
Source: PubMed Central journal article supplement — Genome Biol Evol. 2013 Nov 22;5(12):2420–35. doi: 10.1093/gbe/evt188 (PMC3879976; doi:10.1093/gbe/evt188), 2013-11-22
Supplement: supp_evt188_Supplementary_Figure_2.pdf [file supp_evt188_Supplementary_Figure_2.pdf]

a)

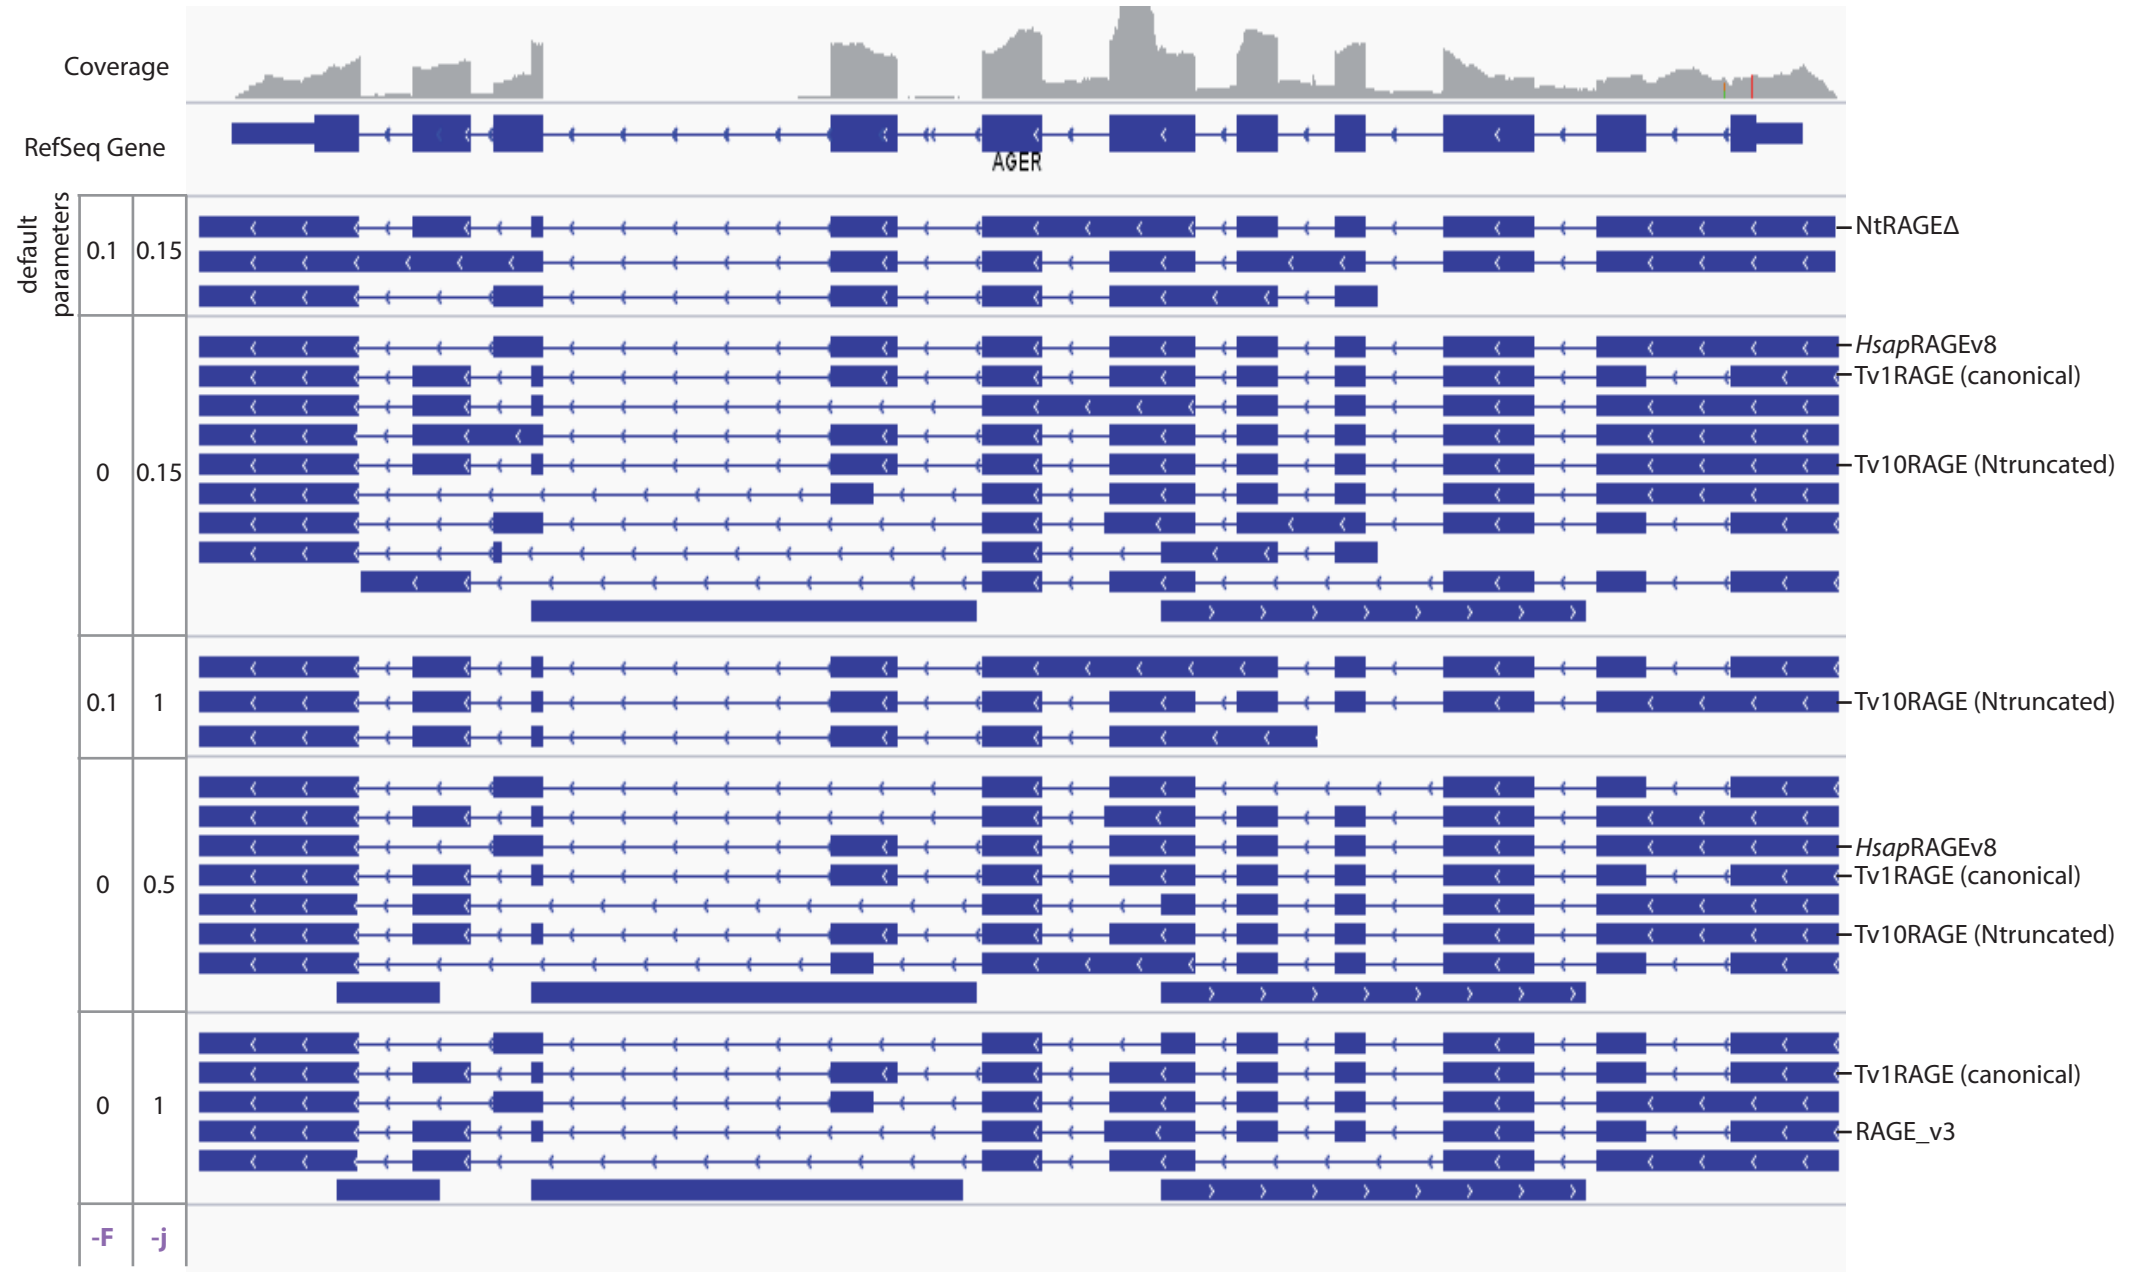

*b) Homo sapiens*

| PMID     | Samples | Brain |       | Liver |  |
|----------|---------|-------|-------|-------|--|
|          |         | Brain | Liver |       |  |
| 18978789 | brain   |       |       |       |  |
| 23258890 | hsabrF1 |       |       |       |  |
| 23258890 | hsabrM1 |       |       |       |  |
| 23258890 | hsabrM2 |       |       |       |  |
| 23258890 | hsabrM3 |       |       |       |  |
| 23258890 | hsabrM4 |       |       |       |  |
| 23258890 | hsabrM5 |       |       |       |  |
| 18978789 | liver   |       |       |       |  |
| 23258890 | hsaLVm1 |       |       |       |  |
| 23258890 | hsaLVm2 |       |       |       |  |

c) *Macaca mulatta*

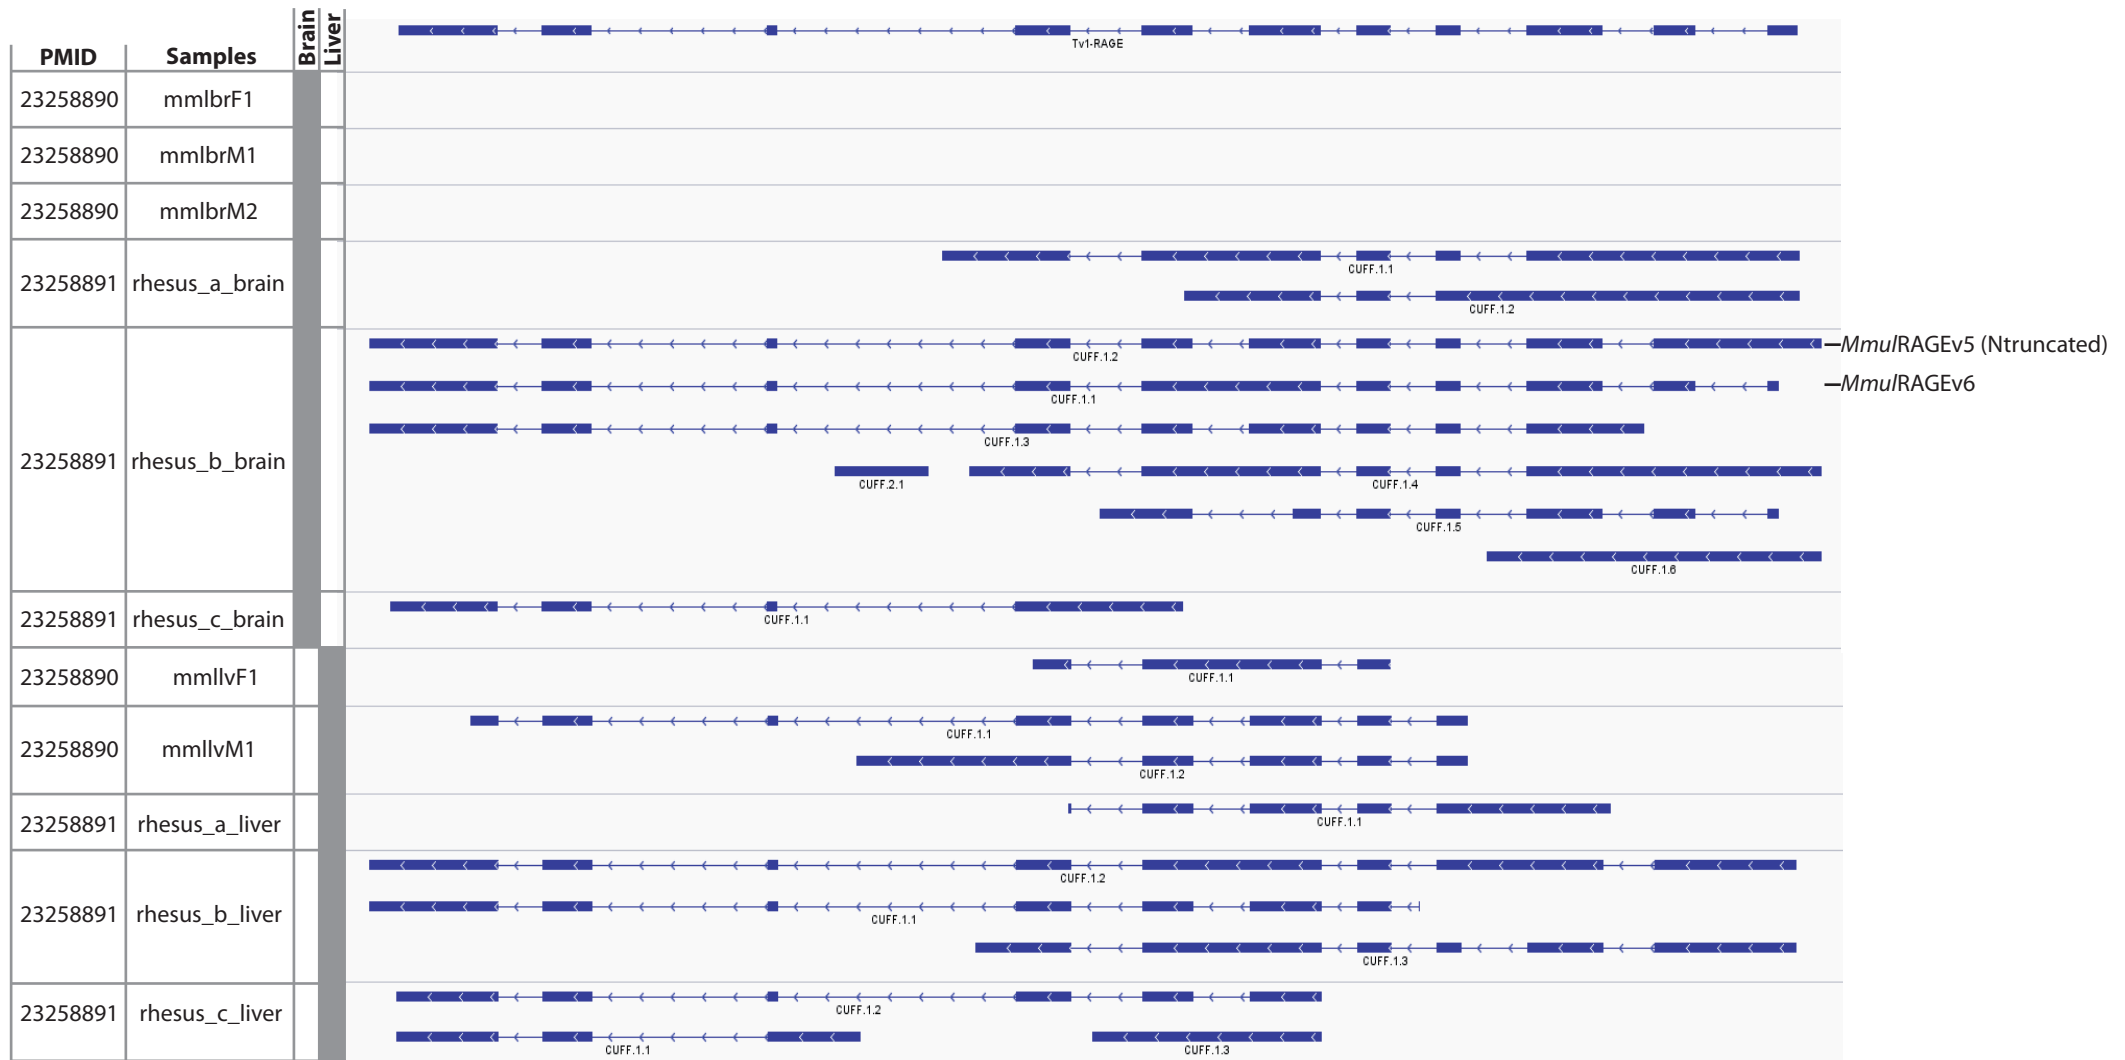

d) *Bos taurus*

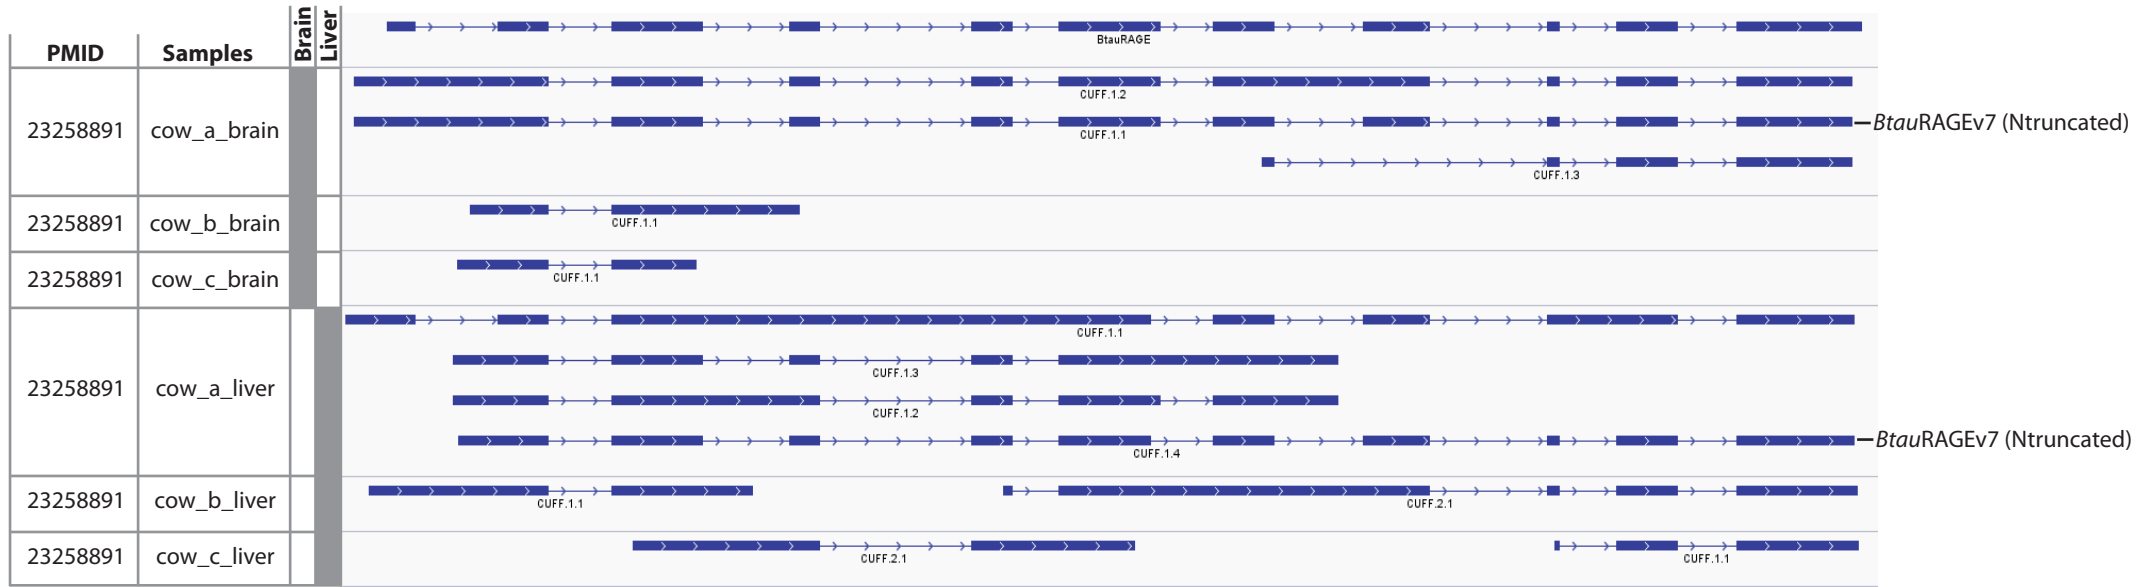

e)

*Mus musculus*

| PMID     | Samples       | Brain |       | Liver |  |
|----------|---------------|-------|-------|-------|--|
|          |               | Brain | Liver |       |  |
| 23258890 | mmubrF1       |       |       |       |  |
| 23258890 | mmubrM1       |       |       |       |  |
| 23258890 | mmubrM2       |       |       |       |  |
| 23258891 | mouse_a_brain |       |       |       |  |
| 23258891 | mouse_b_brain |       |       |       |  |
| 23258891 | mouse_c_brain |       |       |       |  |
| 23258890 | mmulvF        |       |       |       |  |
| 23258890 | mmulvM1       |       |       |       |  |
| 23258890 | mmulvM2       |       |       |       |  |
| 23258891 | mouse_a_liver |       |       |       |  |
| 23258891 | mouse_b_liver |       |       |       |  |
| 23258891 | mouse_c_liver |       |       |       |  |

*Rattus norvegicus*

| PMID     | Samples     | Brain |       | Liver |  |
|----------|-------------|-------|-------|-------|--|
|          |             | Brain | Liver |       |  |
| 23258891 | rat_a_brain |       |       |       |  |
| 23258891 | rat_b_brain |       |       |       |  |
| 23258891 | rat_c_brain |       |       |       |  |
| 23258891 | rat_a_liver |       |       |       |  |
| 23258891 | rat_b_liver |       |       |       |  |
| 23258891 | rat_c_liver |       |       |       |  |
