# Supplementary material for: Complex Tissue-Specific Patterns and Distribution of Multiple RAGE Splice Variants in Different Mammals
Source: PubMed Central journal article supplement — Genome Biol Evol. 2013 Nov 22;5(12):2420–35. doi: 10.1093/gbe/evt188 (PMC3879976; doi:10.1093/gbe/evt188), 2013-11-22
Supplement: supp_evt188_Supplementary_Figure_3.pdf [file supp_evt188_Supplementary_Figure_3.pdf]

## Homo sapiens

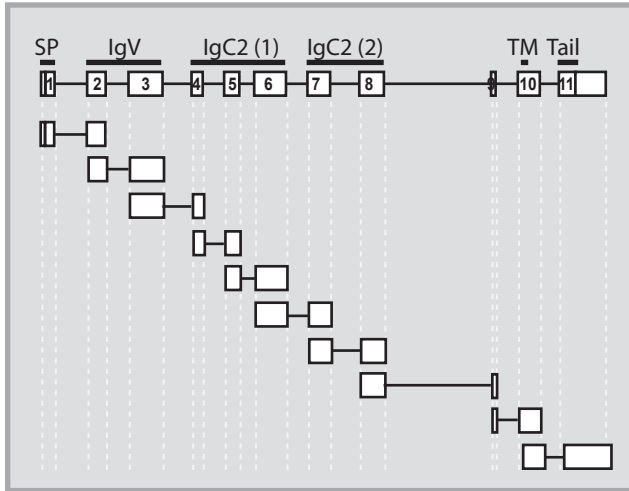

| Tissue:  | Brain    |          |          |          |          |          | Liver    |          |          |          |
|----------|----------|----------|----------|----------|----------|----------|----------|----------|----------|----------|
| Samples: | brain    | hsabrF1  | hsabrM1  | hsabrM2  | hsabrM3  | hsabrM4  | hsabrM5  | liver    | hsaLVm1  | hsaLVm2  |
| PMID:    | 18978789 | 23258890 | 23258890 | 23258890 | 23258890 | 23258890 | 23258890 | 18978789 | 23258890 | 23258890 |
|          | 0,000    | 0,000    | 0,000    | 0,000    | 0,041    | 0,029    | 0,000    | 0,000    | 0,000    | 0,042    |
|          | 0,000    | 0,000    | 0,000    | 0,000    | 0,000    | 0,029    | 0,000    | 0,000    | 0,000    | 0,084    |
|          | 0,000    | 0,000    | 0,000    | 0,000    | 0,000    | 0,057    | 0,000    | 0,000    | 0,000    | 0,084    |
|          | 0,000    | 0,000    | 0,000    | 0,000    | 0,000    | 0,086    | 0,000    | 0,000    | 0,000    | 0,126    |
|          | 0,000    | 0,000    | 0,000    | 0,000    | 0,082    | 0,086    | 0,000    | 0,004    | 0,023    | 0,042    |
|          | 0,000    | 0,000    | 0,053    | 0,000    | 0,082    | 0,143    | 0,000    | 0,000    | 0,093    | 0,042    |
|          | 0,000    | 0,000    | 0,053    | 0,000    | 0,082    | 0,029    | 0,126    | 0,000    | 0,093    | 0,042    |
|          | 0,000    | 0,000    | 0,053    | 0,000    | 0,082    | 0,115    | 0,000    | 0,000    | 0,046    | 0,042    |
|          | 0,000    | 0,041    | 0,053    | 0,044    | 0,000    | 0,057    | 0,000    | 0,000    | 0,046    | 0,042    |
|          | 0,000    | 0,041    | 0,000    | 0,000    | 0,041    | 0,115    | 0,000    | 0,000    | 0,023    | 0,084    |

## Macaca mulatta

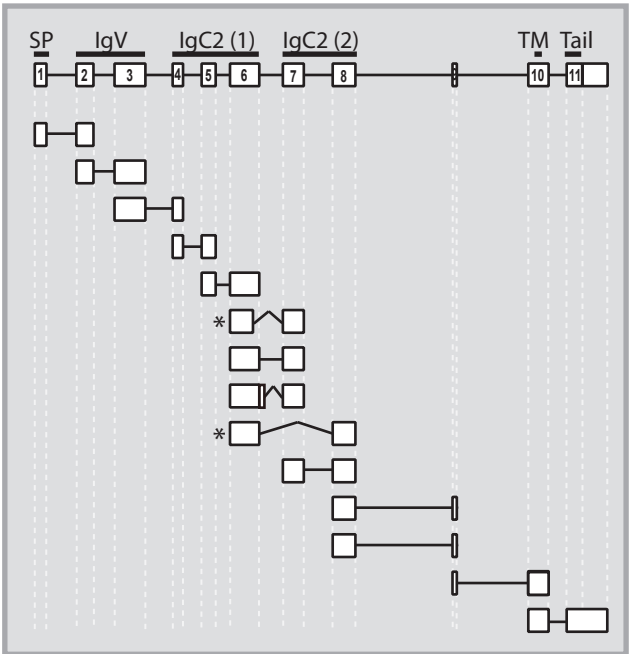

| Tissue:  | Brain    |          |          |          |          |          | Liver    |          |          |          |          |
|----------|----------|----------|----------|----------|----------|----------|----------|----------|----------|----------|----------|
| Samples: | mmlbr    | mmubr    | mmubr    | rhesus_  | rhesus_  | rhesus_  | mmulv    | mmulv    | rhesus_  | rhesus_  | rhesus_  |
|          | F1       | M1       | M2       | a_brain  | b_brain  | c_brain  | F1       | M1       | a_liver  | b_liver  | c_liver  |
| PMID:    | 23258890 | 23258890 | 23258890 | 23258891 | 23258891 | 23258891 | 23258890 | 23258890 | 23258891 | 23258891 | 23258891 |
|          | 0,052    | 0,044    | 0,000    | 0,000    | 0,023    | 0,000    | 0,000    | 0,000    | 0,000    | 0,009    | 0,000    |
|          | 0,052    | 0,044    | 0,000    | 0,000    | 0,037    | 0,000    | 0,000    | 0,000    | 0,000    | 0,018    | 0,000    |
|          | 0,052    | 0,044    | 0,000    | 0,029    | 0,060    | 0,000    | 0,000    | 0,000    | 0,000    | 0,013    | 0,000    |
|          | 0,052    | 0,044    | 0,000    | 0,043    | 0,070    | 0,057    | 0,000    | 0,062    | 0,088    | 0,084    | 0,000    |
|          | 0,052    | 0,000    | 0,000    | 0,100    | 0,144    | 0,000    | 0,092    | 0,093    | 0,018    | 0,066    | 0,019    |
|          | 0,000    | 0,000    | 0,000    | 0,000    | 0,005    | 0,000    | 0,000    | 0,000    | 0,000    | 0,000    | 0,000    |
|          | 0,000    | 0,000    | 0,047    | 0,000    | 0,037    | 0,000    | 0,000    | 0,062    | 0,070    | 0,027    | 0,037    |
|          | 0,000    | 0,000    | 0,000    | 0,000    | 0,005    | 0,000    | 0,000    | 0,000    | 0,000    | 0,000    | 0,000    |
|          | 0,000    | 0,000    | 0,000    | 0,000    | 0,005    | 0,000    | 0,000    | 0,000    | 0,000    | 0,000    | 0,000    |
|          | 0,157    | 0,000    | 0,047    | 0,000    | 0,116    | 0,000    | 0,138    | 0,217    | 0,088    | 0,018    | 0,075    |
|          | 0,000    | 0,000    | 0,047    | 0,014    | 0,042    | 0,019    | 0,000    | 0,062    | 0,000    | 0,000    | 0,037    |
|          | 0,000    | 0,000    | 0,000    | 0,000    | 0,000    | 0,000    | 0,000    | 0,000    | 0,000    | 0,031    | 0,000    |
|          | 0,000    | 0,000    | 0,000    | 0,000    | 0,056    | 0,076    | 0,000    | 0,000    | 0,000    | 0,027    | 0,037    |
|          | 0,000    | 0,000    | 0,000    | 0,043    | 0,176    | 0,113    | 0,184    | 0,000    | 0,018    | 0,075    | 0,056    |

# Bos taurus

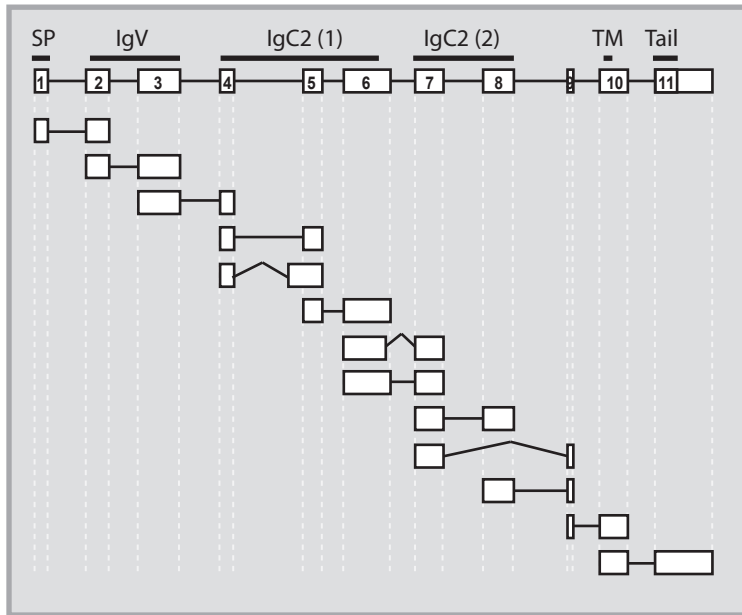

| Tissue:        | Brain        |              |              | Liver        |              |              |
|----------------|--------------|--------------|--------------|--------------|--------------|--------------|
|                | cow_ a_brain | cow_ b_brain | cow_ c_brain | cow_ a_liver | cow_ b_liver | cow_ c_liver |
| PMID: 23258891 | 0,000        | 0,000        | 0,000        | 0,000        | 0,000        | 0,000        |
|                | 0,029        | 0,053        | 0,119        | 0,058        | 0,058        | 0,000        |
|                | 0,019        | 0,000        | 0,000        | 0,034        | 0,000        | 0,000        |
|                | 0,014        | 0,000        | 0,030        | 0,039        | 0,038        | 0,017        |
|                | 0,000        | 0,000        | 0,000        | 0,010        | 0,000        | 0,000        |
|                | 0,010        | 0,000        | 0,015        | 0,058        | 0,038        | 0,000        |
|                | 0,024        | 0,035        | 0,015        | 0,034        | 0,000        | 0,000        |
|                | 0,000        | 0,000        | 0,000        | 0,005        | 0,000        | 0,000        |
|                | 0,014        | 0,035        | 0,030        | 0,019        | 0,000        | 0,000        |
|                | 0,005        | 0,000        | 0,000        | 0,000        | 0,000        | 0,000        |
|                | 0,053        | 0,000        | 0,030        | 0,063        | 0,019        | 0,000        |
|                | 0,105        | 0,000        | 0,000        | 0,049        | 0,038        | 0,034        |
|                | 0,163        | 0,018        | 0,000        | 0,180        | 0,154        | 0,103        |

# Mus musculus

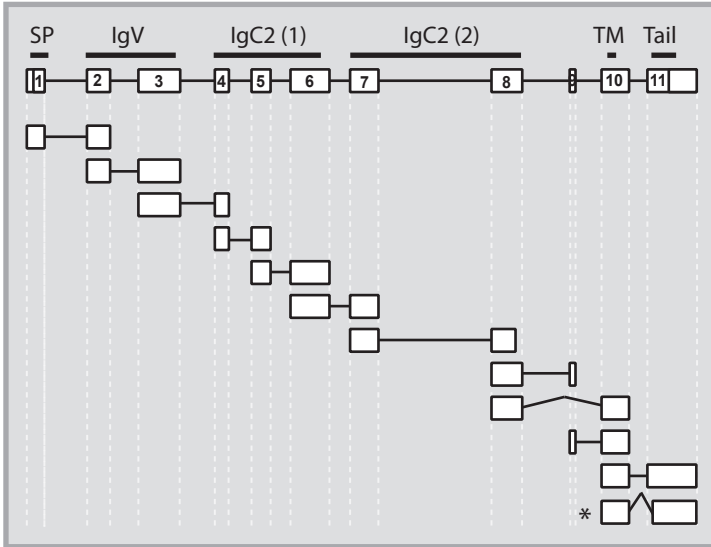

| Tissue:  | Brain    |          |          |          |          |          | Liver    |          |          |          |          |          |
|----------|----------|----------|----------|----------|----------|----------|----------|----------|----------|----------|----------|----------|
|          | mmubr    | mmubr    | mmubr    | mouse_   | mouse_   | mouse_   | mmulv    | mmulv    | mmulv    | mouse_   | mouse_   | mouse_   |
| Samples: | F1       | M1       | M2       | a_brain  | b_brain  | c_brain  | F1       | M1       | M2       | a_liver  | b_liver  | c_liver  |
| PMID:    | 23258890 | 23258890 | 23258890 | 23258891 | 23258891 | 23258891 | 23258890 | 23258890 | 23258890 | 23258891 | 23258891 | 23258891 |
|          | 0,000    | 0,000    | 0,000    | 0,011    | 0,000    | 0,000    | 0,000    | 0,000    | 0,000    | 0,000    | 0,000    | 0,000    |
|          | 0,040    | 0,013    | 0,000    | 0,017    | 0,008    | 0,015    | 0,000    | 0,000    | 0,000    | 0,004    | 0,000    | 0,000    |
|          | 0,040    | 0,039    | 0,000    | 0,017    | 0,021    | 0,015    | 0,000    | 0,000    | 0,029    | 0,000    | 0,004    | 0,014    |
|          | 0,000    | 0,000    | 0,000    | 0,017    | 0,042    | 0,015    | 0,000    | 0,000    | 0,000    | 0,000    | 0,007    | 0,000    |
|          | 0,000    | 0,000    | 0,051    | 0,000    | 0,034    | 0,000    | 0,000    | 0,000    | 0,000    | 0,000    | 0,015    | 0,014    |
|          | 0,000    | 0,000    | 0,000    | 0,000    | 0,017    | 0,000    | 0,000    | 0,000    | 0,000    | 0,000    | 0,000    | 0,000    |
|          | 0,040    | 0,013    | 0,000    | 0,006    | 0,059    | 0,015    | 0,000    | 0,000    | 0,000    | 0,000    | 0,007    | 0,000    |
|          | 0,000    | 0,013    | 0,000    | 0,000    | 0,017    | 0,000    | 0,000    | 0,000    | 0,000    | 0,000    | 0,007    | 0,000    |
|          | 0,000    | 0,000    | 0,000    | 0,006    | 0,008    | 0,000    | 0,021    | 0,000    | 0,000    | 0,000    | 0,000    | 0,000    |
|          | 0,000    | 0,000    | 0,000    | 0,000    | 0,004    | 0,000    | 0,000    | 0,000    | 0,000    | 0,000    | 0,000    | 0,000    |
|          | 0,040    | 0,026    | 0,000    | 0,023    | 0,029    | 0,000    | 0,000    | 0,000    | 0,000    | 0,004    | 0,004    | 0,000    |
|          | 0,000    | 0,000    | 0,000    | 0,000    | 0,008    | 0,000    | 0,000    | 0,000    | 0,000    | 0,000    | 0,000    | 0,000    |

# Rattus norvegicus

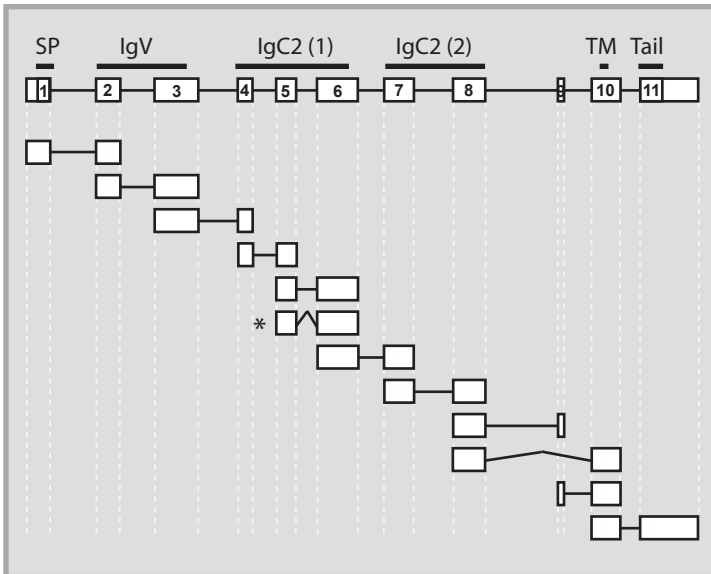

| Tissue:  | Brain    |          |          | Liver    |          |          |
|----------|----------|----------|----------|----------|----------|----------|
|          | rat_     | rat_     | rat_     | rat_     | rat_     | rat_     |
| Samples: | a_brain  | b_brain  | c_brain  | a_liver  | b_liver  | c_liver  |
| PMID:    | 23258891 | 23258891 | 23258891 | 23258891 | 23258891 | 23258891 |
|          | 0,013    | 0,000    | 0,000    | 0,000    | 0,000    | 0,000    |
|          | 0,084    | 0,005    | 0,031    | 0,019    | 0,011    | 0,000    |
|          | 0,042    | 0,005    | 0,015    | 0,000    | 0,000    | 0,000    |
|          | 0,080    | 0,057    | 0,031    | 0,000    | 0,008    | 0,036    |
|          | 0,328    | 0,145    | 0,062    | 0,019    | 0,030    | 0,012    |
|          | 0,004    | 0,000    | 0,000    | 0,000    | 0,000    | 0,000    |
|          | 0,227    | 0,083    | 0,062    | 0,000    | 0,000    | 0,000    |
|          | 0,189    | 0,083    | 0,031    | 0,000    | 0,011    | 0,000    |
|          | 0,042    | 0,021    | 0,000    | 0,038    | 0,015    | 0,000    |
|          | 0,029    | 0,016    | 0,000    | 0,000    | 0,000    | 0,000    |
|          | 0,122    | 0,016    | 0,015    | 0,000    | 0,000    | 0,000    |
|          | 0,332    | 0,239    | 0,139    | 0,000    | 0,034    | 0,024    |
