# Supplementary material for: Complex Tissue-Specific Patterns and Distribution of Multiple RAGE Splice Variants in Different Mammals
Source: PubMed Central journal article supplement — Genome Biol Evol. 2013 Nov 22;5(12):2420–35. doi: 10.1093/gbe/evt188 (PMC3879976; doi:10.1093/gbe/evt188), 2013-11-22
Supplement: supp_evt188_Supplementary_Table_1.pdf [file supp_evt188_Supplementary_Table_1.pdf]

| Species                  | Tissue Name                        | Tissue Type  | Donor Information |                    |              | Catalog No.  |
|--------------------------|------------------------------------|--------------|-------------------|--------------------|--------------|--------------|
|                          |                                    |              | Sex               | Age                | Pool         |              |
| <i>Homo sapiens</i>      | Blood (Peripheral Blood Leukocyte) | Normal Adult | Male              | 50 years old       | 1 donor      | R1234148-50  |
| <i>Homo sapiens</i>      | Brain                              | Normal Adult | Male              | 30 years old       | 1 donor      | R1234035-50  |
| <i>Homo sapiens</i>      | Kidney                             | Normal Adult | Male              | 65 years old       | 1 donor      | R1234142-50  |
| <i>Homo sapiens</i>      | Liver                              | Normal Adult | Male              | 64 years old       | 1 donor      | R1234149-50  |
| <i>Homo sapiens</i>      | Lung                               | Normal Adult | Male              | 24 years old       | 1 donor      | R1234152-50  |
| <i>Homo sapiens</i>      | Pancreas                           | Normal Adult | Male              | 44 years old       | 1 donor      | R1234188-50  |
| <i>Homo sapiens</i>      | Spleen                             | Normal Adult | Male              | 29 years old       | 1 donor      | R1234246-50  |
| <i>Homo sapiens</i>      | Thymus                             | Normal Adult | Male              | 21 years old       | 1 donor      | R1234264-50  |
| <i>Homo sapiens</i>      | Kidney                             | Tumour Adult | Female            | 28 years old       | 1 donor      | R1235142-50  |
| <i>Homo sapiens</i>      | Liver                              | Tumour Adult | Male              | 65 years old       | 1 donor      | R1235149-50  |
| <i>Homo sapiens</i>      | Lung                               | Tumour Adult | Female            | 39 years old       | 1 donor      | R1235152-50  |
| <i>Homo sapiens</i>      | Brain                              | Fetal        | Female            | 28 weeks old       | 1 donor      | R1244035-50  |
| <i>Homo sapiens</i>      | Heart                              | Fetal        | Female            | 33 weeks old       | 1 donor      | R1244122-50  |
| <i>Homo sapiens</i>      | Kidney                             | Fetal        | Female            | 30 weeks old       | 1 donor      | R1244142-50  |
| <i>Homo sapiens</i>      | Liver                              | Fetal        | Male              | 38 weeks old       | 1 donor      | R1244149-50  |
| <i>Homo sapiens</i>      | Lung                               | Fetal        | Female            | 37 weeks old       | 1 donor      | R1244152-50  |
| <i>Homo sapiens</i>      | Spleen                             | Fetal        | Male              | 40 weeks old       | 1 donor      | R1244246-50  |
| <i>Homo sapiens</i>      | Thymus                             | Fetal        | Male              | 24 weeks old       | 1 donor      | R1244264-50  |
| <i>Macaca mulatta</i>    | Brain                              | Normal       | Male              | unknown            | 1 donor      | R1534035-50  |
| <i>Macaca mulatta</i>    | Heart                              | Normal       | Female            | 4,5 years old      | 1 donor      | R1534122-50  |
| <i>Macaca mulatta</i>    | Kidney                             | Normal       | Female            | 4,5 years old      | 1 donor      | R1534142-50  |
| <i>Macaca mulatta</i>    | Liver                              | Normal       | Male              | 4,5 years old      | 1 donor      | R1534149-50  |
| <i>Macaca mulatta</i>    | Lung                               | Normal       | Male              | 4,5 years old      | 1 donor      | S1534152     |
| <i>Macaca mulatta</i>    | Pancreas                           | Normal       | Male              | 2,5 years old      | 1 donor      | R1534188-50  |
| <i>Bos taurus</i>        | Brain                              | Normal       | Female            | 2 years old        | 1 donor      | R1B34035     |
| <i>Bos taurus</i>        | Heart                              | Normal       | Female            | 2 years old        | 1 donor      | R1B34122     |
| <i>Bos taurus</i>        | Kidney                             | Normal       | Female            | 2 years old        | 1 donor      | R1B34142     |
| <i>Bos taurus</i>        | Liver                              | Normal       | Female            | 2 years old        | 1 donor      | R1B34149     |
| <i>Bos taurus</i>        | Lung                               | Normal       | Female            | 2 years old        | 1 donor      | R1B34152     |
| <i>Bos taurus</i>        | Spleen                             | Normal       | Female            | 2 years old        | 1 donor      | R1B34246     |
| <i>Sus scrofa</i>        | Brain                              | Normal       | Female            | 7,5 years old      | 1 donor      | R1934035     |
| <i>Sus scrofa</i>        | Heart                              | Normal       | Female            | 7,5 years old      | 1 donor      | R1934122     |
| <i>Sus scrofa</i>        | Kidney                             | Normal       | Female            | 7,5 years old      | 1 donor      | R1934142     |
| <i>Sus scrofa</i>        | Liver                              | Normal       | Female            | 7,5 years old      | 1 donor      | R1934149     |
| <i>Sus scrofa</i>        | Lung                               | Normal       | Female            | 7,5 years old      | 1 donor      | R11934152    |
| <i>Sus scrofa</i>        | Spleen                             | Normal       | Female            | 7,5 years old      | 1 donor      | R1934246     |
| <i>Mus musculus</i>      | 11 days                            | Embryonic    | Unknown           | 11 days old        | 5 donors     | R1334XI-50   |
| <i>Mus musculus</i>      | 15 days                            | Embryonic    | Unknown           | 15 days old        | 2 donors     | R1334XV-50   |
| <i>Mus musculus</i>      | 17 days                            | Embryonic    | Unknown           | 17 days old        | 2 donors     | R1334XVII-50 |
| <i>Mus musculus</i>      | Brain                              | Normal Adult | Male              | 12 weeks old       | 1 donor      | R1334035-50  |
| <i>Mus musculus</i>      | Heart                              | Normal Adult | Unknown           | Unknown            | 15 donors    | R1334122-50  |
| <i>Mus musculus</i>      | Kidney                             | Normal Adult | Female            | 3-4 weeks old      | 20 donors    | R1334142-50  |
| <i>Mus musculus</i>      | Liver                              | Normal Adult | Female            | 8 weeks old        | 1 donor      | R1334149-50  |
| <i>Mus musculus</i>      | Lung                               | Normal Adult | Female            | 3-4 weeks old      | 20 donors    | R1334152-50  |
| <i>Mus musculus</i>      | Pancreas                           | Normal Adult | Female            | 8,5 weeks old      | 1 donor      | R1334188-50  |
| <i>Rattus norvegicus</i> | 19 days                            | Embryonic    | Unknown           | 19 days old        | 2 donors     | R1434000-50  |
| <i>Rattus norvegicus</i> | Brain                              | Normal Adult | Male              | 10 weeks old       | 4 donors     | R1434035-50  |
| <i>Rattus norvegicus</i> | Heart                              | Normal Adult | Female            | 8-11 weeks old     | 7 donors     | R1434122-50  |
| <i>Rattus norvegicus</i> | Kidney                             | Normal Adult | Male / Female     | 12 / 8-9 weeks old | 3 / 3 donors | R1434142-50  |
| <i>Rattus norvegicus</i> | Liver                              | Normal Adult | Female            | 13,2 weeks old     | 1 donor      | R1434149-50  |
| <i>Rattus norvegicus</i> | Lung                               | Normal Adult | Male              | 24 weeks old       | 3 donors     | R1434152-50  |
| <i>Rattus norvegicus</i> | Pancreas                           | Normal Adult | Female            | 9 weeks old        | 1 donor      | R1434188-50  |
| <i>Rattus norvegicus</i> | Spleen                             | Normal Adult | Female            | 13 weeks old       | 10 donors    | R1434246-50  |
